# Supplementary material for: Use of capture-based next-generation sequencing to detect ALK fusion in plasma cell-free DNA of patients with non-small-cell lung cancer
Source: PubMed Central journal article supplement (PMC5356840; doi:10.18632/oncotarget.13741), 2016-12-01
Supplement: oncotarget-08-2771-s001.pdf [file oncotarget-08-2771-s001.pdf]

## **Use of capture-based next-generation sequencing to detect *ALK* fusion in plasma cell-free DNA of patients with non-small-cell lung cancer**

### **Supplementary Materials**

**Supplementary Table S1: The hybrid capture panel (LungPlasma panel) used to detect *ALK* fusion.**  
see Supplementary\_Table\_S1
